# Supplementary material for: The Effect of Long Chain n-3 Fatty Acid Supplementation on Muscle Strength in Older Adults: A Systematic Review and Meta-Analysis
Source: MDPI journal article supplement (doi:10.3390/nu15163579), 2023-08-14
Supplement: s1 [file s1]

**Supplementary Table S1.** Keyword and search terms

| Search Number | Search Term                                                                                                                          |
|---------------|--------------------------------------------------------------------------------------------------------------------------------------|
| 1             | "Older adult"[Mesh] OR elderly OR older OR older adults OR elderly OR senior OR senior citizens OR aging population OR elder OR aged |
| 2             | "Fish oil"[Mesh] OR "Krill oil" OR "Omega-3 fatty acids" OR "n3 PUFA" OR "DHA" OR "EPA"                                              |
| 3             | "Muscle AND mass" OR "lean"[Mesh] OR volume" OR "grip*" OR "strength" OR "fat free*" OR "DXA" OR "DEXA"                              |
| 4             | 1 AND 2 AND 3                                                                                                                        |

**Supplementary Table S2.** Participant, intervention, comparison, outcome, and study design (PICOS) with inclusion and exclusion criteria to determine study eligibility.

| Review Questions | Inclusion criteria                                                                               | Exclusion criteria                                                                                                                                              |
|------------------|--------------------------------------------------------------------------------------------------|-----------------------------------------------------------------------------------------------------------------------------------------------------------------|
| Population (P)   | Healthy adults with mean sample age 65 years of age or over.                                     | Participants who had major chronic disease (eg cancer, kidney disease, liver disease, diabetes mellitus and cardiovascular disease, uncontrolled hypertension). |
| Intervention (I) | LCn-3 PUFA (EPA/DHA) supplementation, such as fish oil or krill.                                 | Other interventions, such as exercise or other supplements, included.                                                                                           |
| Comparator (C)   | A control oil, such as vegetable oil or olive oil.                                               | No control oil                                                                                                                                                  |
| Outcomes (O)     | Measurement of muscle mass and muscle strength, with data on and muscle function also extracted. |                                                                                                                                                                 |
| Study design     | Randomised control trials (RCTs).                                                                | Any other study design                                                                                                                                          |
| Other            | Published peer-reviewed articles in scientific journals, in an English language.                 |                                                                                                                                                                 |

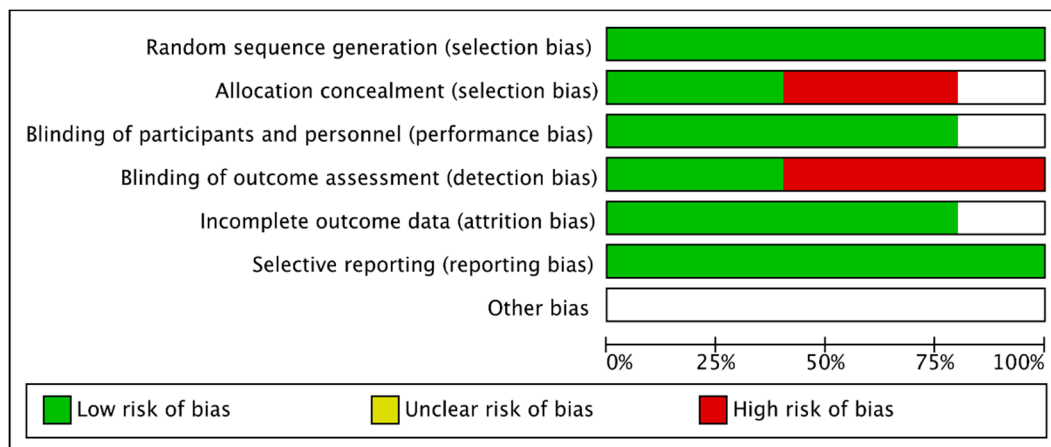

**Supplementary Figure S1.** A Summary of the risk-of-bias for all the included studies.

|                              | Random sequence generation (selection bias) | Allocation concealment (selection bias) | Blinding of participants and personnel (performance bias) | Blinding of outcome assessment (detection bias) | Incomplete outcome data (attrition bias) | Selective reporting (reporting bias) | Other bias |
|------------------------------|---------------------------------------------|-----------------------------------------|-----------------------------------------------------------|-------------------------------------------------|------------------------------------------|--------------------------------------|------------|
| Dengfeng Xu 2022             | +                                           | +                                       | +                                                         | -                                               | +                                        | +                                    |            |
| Gordon I Smith 2015          | +                                           | -                                       | +                                                         | -                                               | +                                        | +                                    |            |
| H L Hutchins-Wiese 2013      | +                                           |                                         | +                                                         | +                                               |                                          | +                                    |            |
| Saleh Alkhedhairi et al 2020 | +                                           | +                                       | +                                                         | +                                               | +                                        | +                                    |            |
| Samantha L Logan 2015        | +                                           | -                                       |                                                           | -                                               | +                                        | +                                    |            |

**Supplementary Figure S2.** Risk of bias assessment for the studies included [24-28].

| Certainty assessment                                       |                   |              |               |              |             |                                     | № of patients |         | Effect                                          | Certainty        |
|------------------------------------------------------------|-------------------|--------------|---------------|--------------|-------------|-------------------------------------|---------------|---------|-------------------------------------------------|------------------|
| № of studies                                               | Study design      | Risk of bias | Inconsistency | Indirectness | Imprecision | Other considerations                | krill oil     | placebo | Absolute-Relative (95% CI)                      |                  |
| Hand Grip Strength (follow-up: range 12 weeks to 24 weeks) |                   |              |               |              |             |                                     |               |         |                                                 |                  |
| 5                                                          | randomised trials | not serious  | serious       | not serious  | serious     | publication bias strongly suspected | 275           | 213     | SMD 0.61 SD higher (-0.05 lower to 1.27 higher) | ⊕○○○<br>Very low |

CI: confidence interval; SMD: standardised mean difference.

**Supplementary Figure S3.** The evidence certainty for the effects of LCn-3 PUFA supplements on hand grip strength was rated very low according to GRADE
